# Supplementary material
Source: publisher figshare collection journal article supplement (https://acs.figshare.com/ndownloader/files/24238805)
Supplement: Supplementary file 1 [file 24238805]

## Sheet: Sheet1
Compounds	Class I	Class II	P1	P2	P3	G1	G2	G3	VIP	Fold_Change	LogFC
Quercetin-O-rutinoside-hexose	Flavonoids	Flavonols	92400	96700	83300	9	9	9	1.51259	10088.9	13.3005
Isorhamnetin-3-O-rutinoside	Flavonoids	Flavonols	37500	24200	29400	17500	22700	19500	0.288528	1.52596	0.60972
Quercetin-3-O-glucoside-7-O-rhamnoside	Flavonoids	Flavonols	75000	76300	60900	143000	93000	76900	0.244606	0.678172	-0.560277
Isorhamnetin acetyl hexoside	Flavonoids	Flavonols	377000	284000	294000	265000	241000	217000	0.231685	1.32089	0.401505
Isorhamnetin hexose-malonate	Flavonoids	Flavonols	461000	357000	353000	206000	212000	209000	0.383943	1.86762	0.901204
Quercetin 3-O-rhanosylgalactoside	Flavonoids	Flavonols	69800	64000	70000	106000	91300	92100	0.2871	0.704216	-0.505911
myricetin-3-O-β-D-glucopyranoside	Flavonoids	Flavonols	1130000	1240000	1430000	9	28300	9	1.40056	134.19	7.06814
Genistin (Genistein 7-O-Glucoside)	Flavonoids	Isoflavones	1400000	774000	322000	143000	145000	184000	0.569285	5.28814	2.40276
Wistin	Flavonoids	Isoflavones	76900	60000	53600	9	9	9	1.482	7055.56	12.7845
Gallic acid	Flavonoids	Flavanols	2200000	2910000	2470000	120000	155000	153000	0.843253	17.7103	4.14652
Myricetin	Flavonoids	Flavonols	28500	41300	36300	9	9	9	1.43205	3929.63	11.9402
Epigallocatechin gallate	Flavonoids	Flavanols	7540	55800	86400	9	9	9	1.41564	5545.93	12.4372
Kumatakenin	Flavonoids	Flavonols	10300	17100	9650	23500	23700	15800	0.324245	0.588095	-0.765878
(-)-Epigallocatechin	Flavonoids	Flavanols	58200	13400	32100	9	9	9	1.41294	3840.74	11.9072
Taxifolin	Flavonoids	Dihydroflavonol	1820000	2140000	1950000	100000	126000	99400	0.848071	18.1623	4.18287
Quercitrin	Flavonoids	Flavonols	317000	331000	331000	17000	34500	9	0.95608	19.0064	4.24841
Vitexin	Flavonoids	Flavonoid carbonoside	9	4580	9	29100	31400	30800	1.11227	0.0503614	-4.31154
(+)-Gallocatechin	Flavonoids	Flavanols	212000	248000	268000	9	9	9	1.59091	26963	14.7187
Catechin	Flavonoids	Flavanols	1140000	707000	846000	2500000	2720000	2560000	0.509147	0.346144	-1.53056
Rutin	Flavonoids	Flavonols	2960000	1280000	1590000	1280000	869000	1000000	0.316387	1.85138	0.888602
Hyperin	Flavonoids	Flavonols	6900000	8970000	9500000	245000	334000	274000	0.916013	29.7421	4.89443
Genistein (4',5,7-Trihydroxyisoflavone)	Flavonoids	Isoflavones	2160000	1430000	516000	337000	242000	227000	0.563192	5.09429	2.34888
Eriodictyol	Flavonoids	Dihydroflavone	247000	294000	271000	33900	44900	43500	0.684397	6.63941	2.73106
Isorhamnetin	Flavonoids	Flavonols	185000	253000	176000	13200	16800	12000	0.812926	14.619	3.86978
Kaempferol 7-O-glucosdie	Flavonoids	Flavonols	7500000	9640000	7770000	9	9	9	1.84598	922593	19.8153
Cyanidin 3-O-rutinoside (Keracyanin chloride)	Flavonoids	Anthocyanins	110000	62600	101000	9	9	9	1.51021	10133.3	13.3068
Malvidin-3-O-Glucoside Chloride (Oenin Chloride)	Flavonoids	Anthocyanins	882000	754000	676000	9	9	9	1.6786	85629.6	16.3858
Pelargonin Chloride	Flavonoids	Anthocyanins	6360	8390	9	9	9	9	0.886362	546.63	9.09442
Protocatechuic acid	Flavonoids	Flavanols	3260000	3930000	3480000	1200000	1660000	1500000	0.465984	2.44725	1.29116
Gallate catechin gallate	Flavonoids	Flavanols	5440	75800	72500	9	3790	9	1.11171	40.3729	5.33532
Dihydromyricetin(Ampelopsin)	Flavonoids	Dihydroflavonol	17600	20100	23800	9	9	9	1.38439	2277.78	11.1534
Pinocembrin(Dihydrochrysin)	Flavonoids	Dihydroflavone	49000	55500	50700	9	9	9	1.46574	5748.15	12.4889
Spiraeoside	Flavonoids	Flavonols	17500000	19600000	17500000	382000	458000	505000	0.958918	40.5948	5.34322
Glycitin (Glycitein 7-O-Glucoside)	Flavonoids	Isoflavones	166000	159000	245000	29800	12100	9	0.906879	13.6009	3.76563
Liquiritigenin	Flavonoids	Dihydroflavone	190000	162000	96800	63200	60100	67200	0.426487	2.35591	1.23628
Glycitein (4',7-Dihydroxy-6-Methoxyisoflavone)	Flavonoids	Isoflavones	40600	27900	23700	22700	21800	20800	0.236563	1.41194	0.497684
2'-Hydroxydaidzein	Flavonoids	Isoflavones	78000	57800	61400	36600	26500	22500	0.441848	2.30374	1.20398
Trifolin	Flavonoids	Flavonols	7340000	7290000	8270000	9	9	9	1.84065	848148	19.694
Prunetin	Flavonoids	Isoflavones	7710	6230	7200	8710	10200	12200	0.284161	0.679524	-0.557403
Kaempferin	Flavonoids	Flavonols	4700	9100	5560	9	12000	15200	0.363011	0.711529	-0.491005
Tricetin	Flavonoids	Flavonoid	50800	61100	50000	9	9	9	1.46903	5996.3	12.5499
Rhamnetin(7-O-Methxyl Quercetin)	Flavonoids	Flavonols	237000	270000	236000	40500	51000	25500	0.6761	6.35043	2.66685
Cyanidin 3-O-Galactoside	Flavonoids	Anthocyanins	23700000	24800000	25600000	106000	23500	22400	1.25969	487.821	8.93021
Kaempferol	Flavonoids	Flavonols	354000	523000	315000	9	9	9	1.62722	44148.1	15.4301
Naringenin chalcone(4,2',4',6'-Tetrahydroxychalcone)	Flavonoids	Chalcones	1830000	1940000	1810000	85000	95300	91400	0.866082	20.5374	4.36018
Garbanzol	Flavonoids	Flavonols	45700	61600	26200	6240	5530	3450	0.71511	8.77135	3.1328
Naringenin-7-O-glucoside	Flavonoids	Dihydroflavone	80100	75100	84500	9	9	9	1.50211	8877.78	13.116
Quercetin-7-O-glucoside	Flavonoids	Flavonols	9950000	10800000	8750000	214000	322000	268000	0.945689	36.6915	5.19738
(-)-Epicatechin gallate	Flavonoids	Flavanols	11900	74400	82300	10800	4290	4360	0.629631	8.66838	3.11576
Phloretin 2'-O-glucoside	Flavonoids	Isoflavones	623000	633000	626000	18100	27700	33500	0.888145	23.7327	4.5688
Avicularin	Flavonoids	Flavonols	8070000	8370000	8220000	332000	453000	518000	0.855044	18.9256	4.24226
Astragalin	Flavonoids	Flavonols	7260000	9100000	7960000	9	9	9	1.84451	900741	19.7808
Peonidin 3-O-glucoside chloride	Flavonoids	Anthocyanins	51900000	55900000	56000000	9	9	9	1.96894	6.06667e+06	22.5325
Gallocatechin 3-O-gallate	Flavonoids	Flavanols	6880	89500	135000	9	4370	9	1.14107	52.7302	5.72056
Catechin gallate	Flavonoids	Flavanols	6670	87600	104000	10500	6890	9	0.761874	11.3955	3.51039
Tamarixetin	Flavonoids	Flavonols	178000	227000	162000	13900	14200	9	0.946737	20.1715	4.33424
Licochalcone E	Flavonoids	Chalcones	46400	59900	60300	79100	94500	95600	0.331709	0.618871	-0.69229
Glabranine	Flavonoids	Dihydroflavone	91700	56500	61600	102000	99300	104000	0.280778	0.687193	-0.541213
Quercetin-3-O-α-L-arabinopyranoside(guaijaverin)	Flavonoids	Flavonols	7850000	8680000	7560000	242000	339000	400000	0.892058	24.5566	4.61804
Peonidin O-hexoside	Flavonoids	Anthocyanins	41400000	49000000	47600000	9	9	9	1.95795	5.11111e+06	22.2852
Cyanidin 3-O-malonylhexoside	Flavonoids	Anthocyanins	349000	397000	353000	9	9	9	1.62303	40703.7	15.3129
Cyanidin 3-O-Glucoside (Kuromanin)	Flavonoids	Anthocyanins	29900000	31300000	31000000	92400	28000	14900	1.29261	681.449	9.41246
Syringetin 3-O-hexoside	Flavonoids	Flavonols	8440	8460	17900	12100	22900	9	0.442974	0.99403	-0.00863855
Luteolin 3',7-di-O-glucoside	Flavonoids	Flavonoid	74300	80400	49800	9	9	9	1.48696	7574.07	12.8869
Chrysoeriol O-malonylhexoside	Flavonoids	Flavonoid	141000	112000	120000	118000	127000	128000	0.00516707	1	0
6-C-Hexosyl-luteolin O-hexoside	Flavonoids	Flavonoid carbonoside	50800	57100	69200	9	9	9	1.47613	6559.26	12.6793
Eriodictiol C-hexosyl-O-hexoside	Flavonoids	Dihydroflavone	258000	265000	341000	9	9	9	1.6039	32000	14.9658
6-C-Hexosyl luteolin O-pentoside	Flavonoids	Flavonoid carbonoside	29500	36800	31100	3570	4350	5210	0.703724	7.41813	2.89105
6-C-Hexosyl-hesperetin O-hexoside	Flavonoids	Flavonoid carbonoside	10500000	10700000	10000000	1160000	1370000	1470000	0.713941	7.8	2.96347
C-Hexosyl-apigenin O-pentoside	Flavonoids	Flavonoid carbonoside	156000	189000	93100	100000	72100	86900	0.298716	1.69151	0.758308
C-Hexosyl-luteolin O-p-coumaroylhexoside	Flavonoids	Flavonoid carbonoside	224000	228000	223000	103000	120000	131000	0.397137	1.90678	0.931138
C-Hexosyl-luteolin O-feruloylhexoside	Flavonoids	Flavonoid carbonoside	31000	24000	23400	9	9	9	1.40601	2903.7	11.5037
8-C-Hexosyl-luteolin O-hexoside	Flavonoids	Flavonoid carbonoside	213000	379000	279000	228000	266000	203000	0.154717	1.24964	0.321514
Luteolin 8-C-hexosyl-O-hexoside	Flavonoids	Flavonoid	86100	71900	65900	120000	102000	83800	0.241027	0.732178	-0.449734
C-Hexosyl-chrysoeriol O-sinapoylhexoside	Flavonoids	Flavonoid carbonoside	17600	19800	16300	1880	6370	2820	0.624565	4.85095	2.27827
Quercetin 7-O-malonylhexosyl-hexoside	Flavonoids	Flavonoid	91200	93500	79300	6270	7440	7860	0.787918	12.2392	3.61344
Tricin O-malonylhexoside	Flavonoids	Flavonoid	249000	233000	252000	625000	742000	841000	0.517866	0.332428	-1.58889
Tricin 7-O-hexoside	Flavonoids	Flavonoid	267000	270000	254000	152000	192000	226000	0.263978	1.38772	0.472716
Cyanidin O-syringic acid	Flavonoids	Anthocyanins	115000000	144000000	129000000	9	9	9	2.02232	1.43704e+07	23.7766
Cyanidin O-acetylhexoside	Flavonoids	Anthocyanins	40300	65700	51300	9	9	9	1.46493	5825.93	12.5083
Peonidin 3-(6''-Malonylglucoside)	Flavonoids	Anthocyanins	59100	39000	9	28300	19400	32000	0.449613	1.23098	0.299806
Acacetin-O-glucuronic acid	Flavonoids	Flavonoid	25800	27400	32300	9	9	9	1.41398	3166.67	11.6287
Chrysoeriol 5-O-hexoside	Flavonoids	Flavonoid	1350000	1210000	957000	58800	36600	41700	0.896466	25.6528	4.68104
Apigenin 7-O-glucoside(Cosmosiin)	Flavonoids	Flavonoid	120000	80000	29600	10200	4250	11800	0.684729	8.74667	3.12873
Isorhamnetin O-acetyl-hexoside	Flavonoids	Flavonols	128000	123000	113000	23200	28000	24000	0.624913	4.84043	2.27513
Chrysoeriol O-homovanillic acid	Flavonoids	Flavonoid	38200	35600	36400	11200	8710	9260	0.57364	3.77785	1.91757
Eriodictyol C-hexoside	Flavonoids	Dihydroflavone	1040000	1290000	1150000	9	9	9	1.70871	128889	16.9758
Quercetin O-acetylhexoside	Flavonoids	Flavonoid	155000	162000	140000	62700	65800	68300	0.455428	2.32215	1.21546
Tricin O-malonyl rhamnoside	Flavonoids	Flavonoid	6460	7120	4540	3960	3180	3040	0.349965	1.77996	0.831845
Tricin O-saccharic acid	Flavonoids	Flavonoid	758000	708000	805000	231000	266000	279000	0.514641	2.92655	1.5492
Tricin O-eudesmic acid	Flavonoids	Flavonoid	31200	36000	35900	33700	35600	35300	0.0257251	0.98566	-0.0208385
Di-O-methylquercetin	Flavonoids	Flavonols	9610000	10900000	10600000	12800000	13700000	13700000	0.245783	0.773881	-0.369817
Luteolin	Flavonoids	Flavonoid	199000	245000	181000	37900	46200	23500	0.656784	5.80855	2.53818
Methyl gallate	Flavonoids	Flavanols	67700	69700	63000	174000	194000	109000	0.437484	0.420126	-1.25111
Daidzein (4',7-Dihydroxyisoflavone)	Flavonoids	Isoflavones	2680000	1790000	727000	523000	440000	433000	0.496121	3.72278	1.89638
Kaempferol 3-O-rutinoside(Nicotiflorin)	Flavonoids	Flavonols	153000	173000	147000	101000	83800	93400	0.356663	1.70022	0.765718
Naringenin	Flavonoids	Dihydroflavone	1700000	1750000	1620000	81000	87200	81600	0.864363	20.2962	4.34314
Procyanidin A2	Tannins	Proanthocyanidins	392000	288000	394000	9	9	9	1.62047	39777.8	15.2797
Delphinidin	Flavonoids	Anthocyanins	57600	38700	33900	130000	99800	64300	0.408006	0.442707	-1.17558
Malvidin-3-O-Galactoside Chloride (Primulin Chloride)	Flavonoids	Anthocyanins	711000	564000	604000	9	9	9	1.66328	69592.6	16.0866
Malvidin 3-O-glucoside (Oenin)	Flavonoids	Anthocyanins	745000	640000	650000	9	9	9	1.66943	75370.4	16.2017
L-Epicatechin	Flavonoids	Flavanols	649000	179000	307000	8880	21500	13100	0.872601	26.104	4.7062
Phloretin	Flavonoids	Chalcones	605000	760000	662000	2800	2420	9	1.28343	387.646	8.5986
Delphinidin 3-O-glucoside (Mirtillin)	Flavonoids	Anthocyanins	54600000	55700000	62600000	267000	257000	334000	1.14781	201.515	7.65474
Daidzin (Daidzein 7-O-Glucoside)	Flavonoids	Isoflavones	6730000	4050000	1900000	480000	442000	738000	0.666338	7.63855	2.9333
Hesperetin 5-O-glucoside	Flavonoids	Dihydroflavonol	19900000	22200000	22000000	410000	476000	578000	0.968908	43.7842	5.45234
Kaempferol 3-O-robinobioside(Biorobin)	Flavonoids	Flavonols	19600	42200	34400	9	9	9	1.41933	3562.96	11.7989
Cyanidin 3-O-rutinoside (Keracyanin)	Flavonoids	Anthocyanins	97000	52000	52300	9	9	9	1.48324	7455.56	12.8641
Protocatechuic aldehyde	Flavonoids	Flavanols	336000	357000	334000	46700	61700	82600	0.645229	5.37696	2.42679
Quercetin	Flavonoids	Flavonols	1860000	2470000	1600000	9	9	9	1.74599	219630	17.7447
Quercetin 3-O-glucoside(Isotrifoliin)	Flavonoids	Flavonols	17500000	24000000	19300000	329000	495000	410000	0.982699	49.2707	5.62266
Isoliquiritigenin	Flavonoids	Chalcones	105000	102000	52700	11500	14200	9	0.838841	10.1015	3.3365
Vitexin 2''-O-β-L-rhamnoside	Flavonoids	Flavonoid carbonoside	9	34000	11900	9	39300	117000	0.144495	0.293707	-1.76755
6-Hydroxydaidzein	Flavonoids	Isoflavones	14700	10600	8710	7330	7330	6890	0.296238	1.57819	0.658271
Afzelechin(3,5,7,4'-Tetrahydroxyflavan)	Flavonoids	Isoflavones	25100	18700	23700	9	9	9	1.39273	2500	11.2877
Pelargonidin 3-O-Glucoside（Callistephin)	Flavonoids	Anthocyanins	76200000	81400000	82700000	9	9	9	1.99295	8900000	23.0854
Butin	Flavonoids	Dihydroflavone	1690000	1820000	1620000	87500	92100	93000	0.853273	18.8188	4.2341
7,4'-Dihydroxyflavone	Flavonoids	Flavonoid	25000	31500	22400	7580	4000	9	0.772781	6.80818	2.76727
Cyanidin	Flavonoids	Anthocyanins	558000	689000	555000	67000	39800	61800	0.765939	10.688	3.41792
Peonidin 3-O-glucoside	Flavonoids	Anthocyanins	44300000	53900000	51300000	9	9	9	1.96297	5.53704e+06	22.4007
2,6-Dimethyl-7-octene-2,3,6-triol	Flavonoids	Flavonoid	886000	1110000	1060000	152000	156000	255000	0.645612	5.42806	2.44044
Luteolin-7-O-glucoside	Flavonoids	Flavonoid	28900000	33500000	28500000	9	9	9	1.93132	3.36667e+06	21.6829
Sexangularetin	Flavonoids	Flavonols	12200	10800	12500	12500	12400	13100	0.100708	0.934211	-0.0981804
Bioquercetin	Flavonoids	Flavonols	3120000	2130000	2580000	1350000	1370000	1080000	0.408167	2.06053	1.04301
Juglanin	Flavonoids	Flavonols	202000	202000	188000	9	9	9	1.57512	21925.9	14.4204
Betmidin(Myricetin 3-α-L-arabinofuranoside)	Flavonoids	Flavonols	31100	31300	39500	9	9	9	1.42911	3774.07	11.8819
Kaempferide 3-O-β-D-glucuronide	Flavonoids	Flavonols	90300	85400	99000	9	9	9	1.51326	10174.1	13.3126
Kaempferol 3-O-β-(2''-O-acetyl-β-D-glucuronide)	Flavonoids	Flavonols	996000	1470000	1640000	3230000	2290000	2620000	0.391584	0.504423	-0.987295
Isorhamnetin 3-O-β-(2''-O-acetyl-β-D-glucuronide)	Flavonoids	Flavonols	53000	41800	45600	105000	106000	95200	0.436736	0.458524	-1.12493
Luteolin-7-O-β-D-glucuronide	Flavonoids	Flavonoid	880000	631000	599000	9	9	9	1.67105	78148.1	16.2539
Hispidulin	Flavonoids	Flavonoid	186000	211000	181000	102000	105000	77900	0.412152	2.02878	1.02061
Ladanein	Flavonoids	Flavonoid	58300	107000	51300	146000	141000	99400	0.343283	0.560559	-0.835062
Nepetin	Flavonoids	Flavonoid	112000	135000	91100	42300	44300	23100	0.514418	3.08204	1.62389
Jaceosidin	Flavonoids	Anthocyanins	105000	131000	97800	43700	46800	43600	0.469216	2.48919	1.31567
Eupatilin 3-glucoside	Flavonoids	Flavonoid	60200	51600	49900	9	9	9	1.46903	5988.89	12.5481
Chysoeriol-6,8-di-C-glucoside	Flavonoids	Flavonoid carbonoside	93200	159000	170000	60200	60000	102000	0.3514	1.90009	0.926068
6''-O-Acetylgenistin	Flavonoids	Isoflavones	25000	8460	9910	9	9	3670	1.01619	11.7598	3.55579
"6""-O-Malonyldaidzin"	Flavonoids	Isoflavones	637000	431000	213000	138000	113000	107000	0.507538	3.57821	1.83924
"6""-O-Malonylgenistin"	Flavonoids	Isoflavones	1280000	701000	269000	175000	125000	155000	0.544041	4.94505	2.30599
"6""-O-Malonylglycitin"	Flavonoids	Isoflavones	29600	22300	20800	29900	31900	15800	0.0217679	0.936856	-0.0941013
3’,4’,7-Trihydroxyflavone	Flavonoids	Flavonoid	726000	480000	167000	101000	84600	79600	0.562606	5.17722	2.37218
Liquiritin	Flavonoids	Dihydroflavone	99400	58800	51600	21900	31900	21200	0.474609	2.79733	1.48405
Isoliquiritin	Flavonoids	Chalcones	33300	38400	56300	2980	9	9	1.17778	42.6951	5.416
Liquiritin apioside	Flavonoids	Dihydroflavone	55700	62800	62300	2510	9	9	1.23024	71.519	6.16025
Isoliquiritin apioside	Flavonoids	Chalcones	70800	55600	63000	4300	9	9	1.20146	43.8629	5.45493
Puerarin	Flavonoids	Flavonoid carbonoside	6070000	3890000	1740000	517000	478000	668000	0.649983	7.03548	2.81465
Genistein 8-C-apiosyl(1→6)glucoside	Flavonoids	Flavonoid carbonoside	14700	24100	19900	5470	12400	9710	0.399325	2.12835	1.08974
Genistein 8-C-glucoside	Flavonoids	Flavonoid carbonoside	8110	17400	12800	149000	190000	216000	0.813473	0.069027	-3.85669
Daidzein-4'-glucoside	Flavonoids	Isoflavones	6510000	4310000	1970000	647000	430000	791000	0.648818	6.8469	2.77545
Phellamurin	Flavonoids	Dihydroflavonol	404000	718000	449000	51600	38600	32300	0.787669	12.8245	3.68083
Formononetin 7-O-β-D-glycoside	Flavonoids	Isoflavones	9610	4500	7630	8520	7260	11100	0.161345	0.80878	-0.306181
Apigenin	Flavonoids	Flavonoid	1340000	857000	275000	184000	146000	129000	0.561045	5.38562	2.42911
Isoquercitrin(Quercetin 3-O-β-D-glucoside)	Flavonoids	Flavonols	12300000	12900000	13000000	332000	361000	449000	0.933842	33.4501	5.06394
Apigenin-7-O-(6'-O-acetyl)-β-D-glucoside	Flavonoids	Flavonoid	32800	9760	11000	5030	7600	12400	0.311396	2.13983	1.0975
Apigenin-7-O-(6-O-Malonyl Glucoside)	Flavonoids	Flavonoid	31100	19600	8010	3600	3860	5210	0.548269	4.63378	2.21219
Luteolin-7-O-(6'-O-malonyl)-β-D-glucoside	Flavonoids	Flavonoid	8330	9810	11700	25300	23400	28300	0.48034	0.387532	-1.36761
Quercetin-7-O-(6'-O-malonyl)-β-D-glucoside	Flavonoids	Flavonols	431000	448000	423000	283000	323000	291000	0.300636	1.45151	0.53755
Luteolin-7-O-rutinoside	Flavonoids	Flavonoid	44500	59200	60400	75700	72700	70900	0.248368	0.74829	-0.418331
Luteolin-7,3'-Di-O-β-D-Glucoside	Flavonoids	Flavonoid	342000	306000	331000	40500	26900	29100	0.75857	10.1451	3.34271
Quercetin 3,7-bis-O-β-D-glucoside	Flavonoids	Flavonols	54800	58700	66300	150000	155000	197000	0.498898	0.358167	-1.48129
Sophoraflavanone B	Flavonoids	Dihydroflavone	11800	12400	11700	9260	10300	18100	0.00214143	0.953266	-0.0690492
Leachianone G	Flavonoids	Dihydroflavone	30100	14100	31500	9	9	9	1.39681	2803.7	11.4531
Hesperitin	Flavonoids	Dihydroflavone	19400	24000	18700	10000	12600	14900	0.333868	1.656	0.727703
Narirutin	Flavonoids	Dihydroflavone	8920	9	9	49400	35300	53600	1.1137	0.0646276	-3.95171
Chrysoeriol	Flavonoids	Flavonoid	15900	17600	15300	6760	8290	5640	0.45604	2.35863	1.23795
Bavachin	Flavonoids	Dihydroflavone	1210	3130	2480	2160	2720	2130	0.0618382	0.972896	-0.0396427
Wighteone	Flavonoids	Isoflavones	36900	50500	51500	80300	79200	78300	0.356157	0.584104	-0.775702
6-Hydroxykaempferol-7-O-glucoside	Flavonoids	Flavonols	35700000	21900000	36500000	2880000	6370000	4970000	0.674675	6.61744	2.72627
6-Hydroxykaempferol-3,6-O-Diglucoside	Flavonoids	Flavonols	14400000	15800000	15000000	1170000	1370000	1660000	0.768028	10.7619	3.42786
6-Hydroxykaempferol-7,6-O-Diglucoside	Flavonoids	Flavonols	385000	317000	431000	655000	758000	788000	0.397944	0.514766	-0.958011
6-Hydroxykaempferol-3,7,6-O-triglycoside	Flavonoids	Flavonols	45900	40200	42600	43600	50400	88600	0.206237	0.704819	-0.504675
